**Title:** *NGMASTER: in silico* Multi-Antigen Sequence Typing for *Neisseria gonorrhoeae*

**Running title:** *NGMASTER: in silico* NG-MAST for *Neisseria gonorrhoeae*

**Authors:** Jason C Kwong<sup>1,2,3</sup>, Anders Gonçalves da Silva<sup>1,4</sup>, Kristin Dyet<sup>5</sup>, Deborah A Williamson<sup>1,4</sup>, Timothy P Stinear<sup>1,2</sup>, Benjamin P Howden<sup>1,2,3,4</sup>, Torsten Seemann<sup>1,6</sup>

**Affiliations:**

1. Doherty Applied Microbial Genomics, Peter Doherty Institute for Infection & Immunity, Melbourne, Australia
2. Department of Microbiology & Immunology, University of Melbourne, Parkville, Australia
3. Department of Infectious Diseases, Austin Health, Heidelberg, Australia
4. Microbiological Diagnostic Unit Public Health Laboratory, Peter Doherty Institute for Infection & Immunity, Melbourne, Australia
5. Institute of Environmental Science and Research, Wellington, New Zealand
6. Victorian Life Sciences Computation Initiative, Carlton, Australia

**Keywords:**

*Neisseria gonorrhoeae*  
Multi-antigen sequence typing  
NG-MAST  
Whole-genome sequencing  
*In silico* typing

**Correspondence:**

Dr Jason Kwong  
Doherty Applied Microbial Genomics  
Peter Doherty Institute for Infection & Immunity  
792 Elizabeth Street  
Melbourne, Victoria  
Australia 3000  
Tel: +61 3 8344 5701  
Email: [jason.kwong \(AT\) unimelb.edu.au](mailto:jason.kwong@unimelb.edu.au)

**Acknowledgements:**

We wish to acknowledge the contributions of Helen Heffernan at the Institute of Environmental Science and Research, New Zealand, and Kerrie Stevens and the Molecular Diagnostics section staff at the Microbiological Diagnostic Unit Public Health Laboratory, Australia who assisted in providing NG-MAST data.

# 1 **NGMASTER – *in silico* Multi-Antigen Sequence**

## 2 **Typing for *Neisseria gonorrhoeae***

---

### 5 **ABSTRACT**

7 Whole-genome sequencing (WGS) provides the highest resolution analysis for comparison  
8 of bacterial isolates in public health microbiology. However, although increasingly being  
9 used routinely for some pathogens such as *Listeria monocytogenes* and *Salmonella*  
10 *enterica*, the use of WGS is still limited for other organisms, such as *Neisseria gonorrhoeae*.  
11 Multi-antigen sequence typing (NG-MAST) is the most widely performed typing method for  
12 epidemiologic surveillance of gonorrhoea. Here, we present *NGMASTER* – a command-line  
13 software tool for performing *in silico* NG-MAST on assembled genome data. *NGMASTER*  
14 rapidly and accurately determined the NG-MAST of 630 assembled genomes, facilitating  
15 comparisons between WGS and previously published gonorrhoea epidemiological studies.  
16 The source code and user documentation are available at [https://github.com/MDU-](https://github.com/MDU-PHL/ngmaster)  
17 [PHL/ngmaster](https://github.com/MDU-PHL/ngmaster).

---

### 20 **DATA SUMMARY**

- 21 1. The Python source code for *NGMASTER* is available from GitHub under GNU GPL  
22 v2. (URL: <https://github.com/MDU-PHL/ngmaster>)
- 23 2. The software is installable via the Python “pip” package management system. Install  
24 using “pip install --user git+https://github.com/MDU-PHL/ngmaster.git”
- 25 3. Sequencing data used are available for download from the EBI European Nucleotide  
26 Archive under BioProject accessions [PRJEB2999](https://www.ebi.ac.uk/bioproject/2999), [PRJNA29335](https://www.ebi.ac.uk/bioproject/29335), [PRJNA266539](https://www.ebi.ac.uk/bioproject/266539),  
27 [PRJNA298332](https://www.ebi.ac.uk/bioproject/298332), and [PRJEB14168](https://www.ebi.ac.uk/bioproject/14168).

31 **We confirm all supporting data, code and protocols have been provided within the**  
32 **article or through supplementary data files.**

34

35

36

---

## IMPACT STATEMENT

37

38 Whole-genome sequencing (WGS) offers the potential for high-resolution comparative  
39 analyses of microbial pathogens. However, there remains a need for backward compatibility  
40 with previous molecular typing methods to place genomic studies in context. NG-MAST is  
41 currently the most widely used method for epidemiologic surveillance of *Neisseria*  
42 *gonorrhoeae*. We present *NGMASTER*, a command-line software tool for performing Multi-  
43 Antigen Sequence Typing (NG-MAST) of *Neisseria gonorrhoeae* from WGS data. This tool  
44 is targeted at clinical and research microbiology laboratories that have performed WGS of  
45 *N. gonorrhoeae* isolates and wish to understand the molecular context of their data in  
46 comparison to previously published epidemiological studies. As WGS becomes more  
47 routinely performed, *NGMASTER* was developed to completely replace PCR-based NG-  
48 MAST, reducing time and labour costs.

49

50

51

---

## INTRODUCTION

52

53  
54 *Neisseria gonorrhoeae* is one of the most common sexually transmitted bacterial infections  
55 worldwide. There is growing concern about the global spread of resistant epidemic clones,  
56 with extensively drug-resistant gonorrhoea being listed as an urgent antimicrobial resistance  
57 threat (CDC, 2013; WHO, 2014).

58

59 Multi-Antigen Sequence Typing of *N. gonorrhoeae* (NG-MAST) has been important in  
60 tracking these resistant clones, such as the NG-MAST 1407 clone associated with  
61 decreased susceptibility to third-generation cephalosporins (Unemo & Dillon, 2011). It  
62 involves sequence-based typing using established PCR primers of two highly variable and  
63 polymorphic outer membrane protein genes, *porB* and *tbpB* by comparing the sequences to  
64 an open-access database (<http://www.ng-mast.net/>) (Martin *et al.*, 2004). Although NG-  
65 MAST is the most frequently performed molecular typing method for *N. gonorrhoeae*, it  
66 requires multiple PCR amplification and sequencing reactions, making it more laborious than  
67 other typing methods (Heymans *et al.*, 2012).

68

69 Whole-genome sequencing (WGS) is increasingly being used for molecular typing and  
70 epidemiologic investigation of microbial pathogens as it provides considerably higher  
71 resolution. A number of studies using genomic data to understand the epidemiology of  
72 *N. gonorrhoeae* have already been published (Grad *et al.*, 2014) (Demczuk *et al.*, 2015)  
73 (Ezewudo *et al.*, 2015) (Demczuk *et al.*, 2016). However, the ability to perform retrospective  
74 comparisons with previous epidemiological studies is reliant on conducting both traditional  
75 typing (such as NG-MAST) as well as more modern WGS analyses on the same isolates.

76

77 *NGMASTER* is a command-line software tool for rapidly determining NG-MAST types *in*  
78 *silico* from genome assemblies of *N. gonorrhoeae*.

79

80

81

---

## 82 DESCRIPTION

83

84 *NGMASTER* is an open source tool written in Python and released under a GPLv2 Licence.  
85 The source code can be downloaded from Github (<https://github.com/MDU-PHL/ngmaster>).  
86 It has two software dependencies: *isPcr* (<http://hgwdev.cse.ucsc.edu/~kent/src/>) and  
87 BioPython (Cock *et al.*, 2009), and uses the allele databases publicly available at  
88 <http://www.ng-mast.net/>, which *NGMASTER* can automatically download and update locally  
89 for running.

90

91 *NGMASTER* is based on the laboratory method published by Martin *et al.* (Martin *et al.*,  
92 2004), and uses *isPcr* to retrieve allele sequences from a user-specified genome assembly  
93 in FASTA format by locating the flanking primers. These allele sequences are trimmed to a  
94 set length from starting key motifs in conserved gene regions, and then checked against the  
95 allele databases. Results are printed in machine readable tab- or comma-separated format.

96

97

98

---

## 99 METHODS AND RESULTS

100

101 *NGMASTER* was validated against 630 publicly available *N. gonorrhoeae* genome  
102 sequences derived from published studies (Table 1). This included 8 well characterised  
103 WHO reference genomes with published data and 50 local isolates that had undergone  
104 “traditional” NG-MAST by PCR and Sanger sequencing (Martin *et al.*, 2004). A further 572

105 isolates that had undergone manual *in silico* NG-MAST from WGS data (Demczuk *et al.*,  
106 2015; Demczuk *et al.*, 2016; Grad *et al.*, 2014), including the fully assembled reference  
107 genome NCCP11945, were also tested. Raw WGS data for these sequences were retrieved  
108 from the European Nucleotide Archive (ENA). Average sequencing depth was >30x for all  
109 ENA sequences, with a combination of 100 bp, 250 bp and 300 bp paired-end Illumina  
110 reads. Local isolates also underwent WGS on the Illumina MiSeq/NextSeq using Nextera  
111 libraries and manufacturer protocols, with an average sequencing depth >50x. The raw  
112 sequencing reads for these local isolates have been uploaded to the ENA (BioProject  
113 accession PRJEB14168).

114

115 Sequencing reads were trimmed to clip Illumina adapters and low-quality sequence  
116 (minimum Q20) using *Trimmomatic* v0.35 (Bolger *et al.*, 2014). Draft genomes were  
117 assembled *de novo* with *MEGAHIT* v1.0.3 and *SPAdes* v3.7.1 (Li *et al.*, 2015) (Bankevich *et*  
118 *al.*, 2012) to investigate whether the faster, but approximate genome assembler, *MEGAHIT*,  
119 would be sufficient for *NGMASTER*. A list of the commands and parameters used is  
120 included in the Appendix 1.

121

122 The *de novo* assembled draft genomes and the fully assembled NCCP11945 reference  
123 genome in FASTA format were used as input to *NGMASTER* with the overall results shown  
124 in Table 1. Complete *NGMASTER* results with sequencing and assembly metrics are  
125 included in Appendix 2. Running *NGMASTER* on 630 genome assemblies using a single  
126 Intel(R) Xeon(R) 2.3GHz CPU core was completed in less than two minutes.

127

128 Overall, *NGMASTER* assigned NG-MAST types that were concordant with published results  
129 for 93-97% of the tested *N. gonorrhoeae* genomes using *MEGAHIT* or *SPAdes* assemblies.  
130 Notably, comparisons with results from traditional NG-MAST were 100% concordant (57/57).  
131 Reasons for discordant results are shown in Table 2. In general, running *NGMASTER* using  
132 *SPAdes* assemblies resolved more NG-MAST types than when using *MEGAHIT*  
133 assemblies. However, 10 genomes assembled with *SPAdes* were found to have assembly  
134 errors in either *por* or *tbpB* introduced in the repeat resolution stage, resulting in discordant  
135 NG-MAST types for those isolates (major errors). Running *NGMASTER* on preliminary  
136 contigs prior to this process (“before\_rr.fasta”) alleviated these major errors, and were  
137 concordant with *MEGAHIT* results and the published results (Appendix 2). In contrast, minor  
138 errors (due to incomplete NG-MAST types or multiple alleles detected) were more frequent  
139 using *MEGAHIT* assemblies, particularly those with poor assembly metrics (e.g. >500  
140 contigs, N50 <10 kbp). When *MEGAHIT* assemblies successfully produced complete

141 *NGMASTER* results, these NG-MAST types were highly concordant with the published  
142 results.

143

144 To overcome this issue, a two-stage assembly approach was also tested, where a draft  
145 genome was first assembled using *MEGAHIT* for initial testing. If a complete NG-MAST  
146 result was obtained, this was recorded as the final result for that isolate. If the result was  
147 incomplete or suggested multiple alleles were present, the genome was also assembled  
148 using *SPAdes*. Using this combined approach, 620/630 (98%) NG-MAST types derived from  
149 *NGMASTER* were concordant with the published results, with only 42 genomes requiring  
150 additional assembly with the slower, but more thorough *SPAdes* assembler.

151

152 For the remaining 10 discordant results, seven of these were likely due to errors in the  
153 published data, including for NCCP11945. A further two isolates were found to have multiple  
154 *tbpB* alleles in both *SPAdes* and *MEGAHIT* assemblies, with the dominant allele (indicated  
155 by higher read coverage and better flanking assembly) matching the published result. The  
156 *tbpB* allele for the final isolate was not able to be determined by *NGMASTER* due to a  
157 mutation in the conserved starting key motif required for sequence trimming to a standard  
158 size.

159

160

161

---

## 162 ISSUES WITH IMPLEMENTATION

163

164 The NG-MAST procedure involves sequencing the internal regions of *por* and *tbpB* that  
165 encode two variable outer membrane proteins. The sequences are trimmed to a standard  
166 length from a starting key motif in conserved regions of each gene. However, despite being  
167 relatively conserved, a number of variations of this starting motif appear in the NG-MAST  
168 database (Fig. 1), causing one discordant result (Table 2). Some sequences appeared to  
169 lack a *tbpB* gene due to the presence of non-typeable *tbpB* genes acquired from  
170 *N. meningitidis*, though this was also noted in the published data. Another source of  
171 discordant results were genomes that appeared to have multiple alleles, suggesting isolate  
172 contamination or polyclonal infection.

173

174 A number of isolates were found to have novel alleles or allele combinations that were not in  
175 the most recent version of the database available at <http://www.ng-mast.net>. For

176 convenience, *NGMASTER* includes an option to save these allele sequences in FASTA  
177 format for manual submission to the database and allele type assignment.

178

179 Notably, results were dependent on the accuracy and quality of the *de novo* draft genome  
180 assembly. It should be noted that for this study, draft genomes were assembled *de novo*  
181 using relatively standard parameters for *MEGAHIT* and *SPAdes* without post-assembly error  
182 checking (see Appendix 1). We were alerted to the presence of *SPAdes* assembly errors  
183 after finding the corresponding *MEGAHIT* assemblies produced different *NGMASTER*  
184 results. Concordant results were able to be obtained for each of these genomes after  
185 identifying and correcting assembly errors through re-mapping each isolate's reads back to  
186 the respective draft *SPAdes* assembly. Results from running *NGMASTER* on the *SPAdes*  
187 interim "before\_rr.fasta" contigs also produced concordant results. Assuming accurate  
188 closed genome assemblies are used with an accurate and well curated database, based on  
189 our testing, we anticipate that *NGMASTER* would produce NG-MAST results that were  
190 >99% if not 100% accurate.

191

192

193

---

## 194 CONCLUSION

195

196 *NGMASTER* rapidly and accurately performs *in silico* NG-MAST typing of *N. gonorrhoeae*  
197 from assembled WGS data, and may be a useful command-line tool to help contextualise  
198 genomic epidemiological studies of *N. gonorrhoeae*.

199

200

201

202

203

---

## 204 REFERENCES

205

206 **Bankevich, A., Nurk, S., Antipov, D., Gurevich, A. A., Dvorkin, M., Kulikov, A. S., Lesin,**  
207 **V. M., Nikolenko, S. I., Pham, S., Prjibelski, A. D., Pyshkin, A. V., Sirotkin, A. V.,**  
208 **Vyahhi, N., Tesler, G., Alekseyev, M. A. & Pevzner, P. A. (2012).** SPAdes: a new  
209 genome assembly algorithm and its applications to single-cell sequencing. *J Comput*  
210 *Biol* **19**, 455-477.

211 **Bolger, A. M., Lohse, M. & Usadel, B. (2014).** Trimmomatic: a flexible trimmer for Illumina  
212 sequence data. *Bioinformatics* **30**, 2114-2120.

213 **CDC (2013).** Antibiotic Resistance Threats in the United States, 2013: Centers for Disease  
214 Control and Prevention, US Department of Health and Human Services.

215 **Cock, P. J., Antao, T., Chang, J. T., Chapman, B. A., Cox, C. J., Dalke, A., Friedberg, I.,**  
216 **Hamelryck, T., Kauff, F., Wilczynski, B. & de Hoon, M. J. (2009).** Biopython: freely  
217 available Python tools for computational molecular biology and bioinformatics.  
218 *Bioinformatics* **25**, 1422-1423.

219 **Demczuk, W., Lynch, T., Martin, I., Van Domselaar, G., Graham, M., Bharat, A., Allen,**  
220 **V., Hoang, L., Lefebvre, B., Tyrrell, G., Horsman, G., Haldane, D., Garceau, R.,**  
221 **Wylie, J., Wong, T. & Mulvey, M. R. (2015).** Whole-genome phylogenomic  
222 heterogeneity of *Neisseria gonorrhoeae* isolates with decreased cephalosporin  
223 susceptibility collected in Canada between 1989 and 2013. *J Clin Microbiol* **53**, 191-  
224 200.

225 **Demczuk, W., Martin, I., Peterson, S., Bharat, A., Van Domselaar, G., Graham, M.,**  
226 **Lefebvre, B., Allen, V., Hoang, L., Tyrrell, G., Horsman, G., Wylie, J., Haldane,**  
227 **D., Archibald, C., Wong, T., Unemo, M. & Mulvey, M. R. (2016).** Genomic  
228 Epidemiology and Molecular Resistance Mechanisms of Azithromycin-Resistant  
229 *Neisseria gonorrhoeae* in Canada from 1997 to 2014. *J Clin Microbiol* **54**, 1304-1313.

230 **Ezewudo, M. N., Joseph, S. J., Castillo-Ramirez, S., Dean, D., Del Rio, C., Didelot, X.,**  
231 **Dillon, J. A., Selden, R. F., Shafer, W. M., Turingan, R. S., Unemo, M. & Read, T.**  
232 **D. (2015).** Population structure of *Neisseria gonorrhoeae* based on whole genome  
233 data and its relationship with antibiotic resistance. *PeerJ* **3**, e806.

234 **Grad, Y. H., Kirkcaldy, R. D., Trees, D., Dordel, J., Harris, S. R., Goldstein, E.,**  
235 **Weinstock, H., Parkhill, J., Hanage, W. P., Bentley, S. & Lipsitch, M. (2014).**  
236 Genomic epidemiology of *Neisseria gonorrhoeae* with reduced susceptibility to  
237 cefixime in the USA: a retrospective observational study. *Lancet Infect Dis* **14**, 220-  
238 226.



- 239 **Heymans, R., Golparian, D., Bruisten, S. M., Schouls, L. M. & Unemo, M. (2012).**  
240 Evaluation of *Neisseria gonorrhoeae* multiple-locus variable-number tandem-repeat  
241 analysis, *N. gonorrhoeae* Multiantigen sequence typing, and full-length *porB* gene  
242 sequence analysis for molecular epidemiological typing. *J Clin Microbiol* **50**, 180-183.
- 243 **Li, D., Liu, C. M., Luo, R., Sadakane, K. & Lam, T. W. (2015).** MEGAHIT: an ultra-fast  
244 single-node solution for large and complex metagenomics assembly via succinct de  
245 Bruijn graph. *Bioinformatics* **31**, 1674-1676.
- 246 **Martin, I. M., Ison, C. A., Aanensen, D. M., Fenton, K. A. & Spratt, B. G. (2004).** Rapid  
247 sequence-based identification of gonococcal transmission clusters in a large  
248 metropolitan area. *J Infect Dis* **189**, 1497-1505.
- 249 **Unemo, M. & Dillon, J. A. (2011).** Review and international recommendation of methods for  
250 typing *neisseria gonorrhoeae* isolates and their implications for improved knowledge  
251 of gonococcal epidemiology, treatment, and biology. *Clin Microbiol Rev* **24**, 447-458.
- 252 **WHO (2014).** Antimicrobial resistance: global report on surveillance 2014: World Health  
253 Organization.  
254

255

## 256 FIGURES AND TABLES

257

258 **Table 1:** Concordance between *NGMASTER* results from draft genome assemblies using  
259 *MEGAHIT* and *SPAdes*, and previously published NG-MAST results.

260

|                          | <i>MEGAHIT</i> | <i>SPAdes</i> | 2-stage <sup>§</sup> | TOTAL |
|--------------------------|----------------|---------------|----------------------|-------|
| PRJEB2999 <sup>†</sup>   | 176 (95%)      | 184 (99%)     | 184 (99%)            | 186   |
| PRJNA29335 <sup>#*</sup> | -              | -             | -                    | 1     |
| PRJNA266539 <sup>#</sup> | 162 (91%)      | 169 (94%)     | 178 (99%)            | 179   |
| PRJNA298332 <sup>§</sup> | 199 (93%)      | 207 (97%)     | 208 (97%)            | 214   |
| PRJEB14168 <sup>‡</sup>  | 50 (100%)      | 50 (100%)     | 50 (100%)            | 50    |
| TOTAL                    | 587 (93%)      | 610 (97%)     | 620 (98%)            | 630   |

† Grad *et al.*, Lancet Infect Dis 2014  
# Demczuk *et al.*, J Clin Microbiol 2015  
§ Demczuk *et al.*, J Clin Microbiol 2016  
\* Closed reference genome NCCP11945 (Genbank accession CP001050.1) - *in silico* NG-MAST results reported by Demczuk *et al.* (Demczuk *et al.*, 2015)  
‡ Local isolates with NG-MAST performed by PCR/Sanger sequencing  
§ 2-stage assembly: 1. *NGMASTER* run using rapid assembly with *MEGAHIT*; 2. *NGMASTER* also run using *SPAdes* if no result or mixed result using *MEGAHIT* assembly

261

262

263

264 **Table 2:** Reasons for discordant results between *NGMASTER* and published data using  
265 *SPAdes* assemblies  
266

| <b>Reason for discordant result</b>                    | <b>MEGAHIT</b> | <b>SPAdes</b> |
|--------------------------------------------------------|----------------|---------------|
| <b><i>Major errors (incorrect result)</i></b>          |                |               |
| Assembly error                                         | 0              | 10            |
| <b><i>Minor errors (incomplete/missing result)</i></b> |                |               |
| Alternate conserved key motif                          | 1              | 1             |
| Multiple alleles detected                              | 6              | 2             |
| Allele not detected                                    | 29             | 0             |
| <b><i>Errors in published data</i></b>                 |                |               |
| Possible sequence mix-up in published data             | 4              | 4             |
| Probable transcription error in published data         | 1              | 1             |
| Error in published data                                | 1              | 1             |

267  
268  
269  
270  
271

272 **Figure 1:** Number and frequency of alternate starting key motifs within “conserved” gene  
 273 regions for trimming allele sequences.  
 274

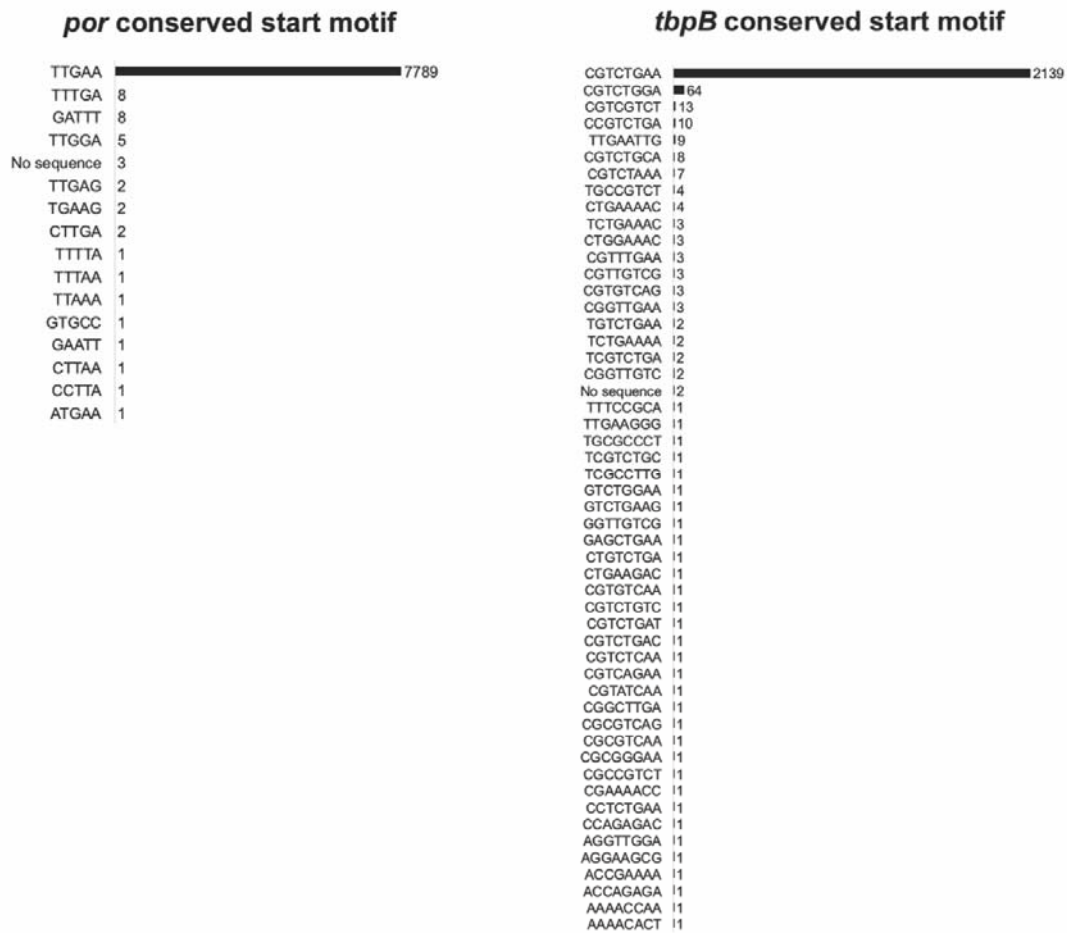

275
